# Supplementary material for: Inclusion of purified dietary fiber during gestation improved the reproductive performance of sows
Source: PubMed Central journal article supplement (PMC7216585; doi:10.1186/s40104-020-00450-5), 2020-05-12
Supplement: 40104_2020_450_MOESM1_ESM.pdf [file 40104_2020_450_MOESM1_ESM.pdf]

**Supplemental Table 1.** Bacterial phyla correlated by Pearson's correlation to gestation stage and DF level.

|                          | Stage       |                 | DF          |                 |
|--------------------------|-------------|-----------------|-------------|-----------------|
|                          | Coefficient | <i>P</i> -value | Coefficient | <i>P</i> -value |
| Firmicutes               | -0.691      | <0.01           | -0.017      | 0.890           |
| Bacteroidetes            | 0.681       | <0.01           | 0.031       | 0.795           |
| Euryarchaeota            | 0.177       | 0.137           | -0.141      | 0.236           |
| Proteobacteria           | 0.450       | <0.01           | 0.153       | 0.200           |
| Spirochaetes             | 0.242       | 0.040           | -0.264      | 0.025           |
| Tenericutes              | -0.576      | <0.01           | -0.090      | 0.454           |
| Cyanobacteria            | 0.363       | <0.01           | -0.253      | 0.032           |
| Actinobacteria           | 0.458       | <0.01           | 0.157       | 0.187           |
| Acidobacteria            | 0.328       | <0.01           | 0.167       | 0.161           |
| Planctomycetes           | 0.369       | <0.01           | -0.103      | 0.392           |
| Verrucomicrobia          | 0.227       | 0.055           | 0.291       | 0.013           |
| Fibrobacteres            | 0.448       | <0.01           | 0.071       | 0.554           |
| Saccharibacteria         | -0.056      | 0.638           | 0.034       | 0.775           |
| Chloroflexi              | 0.252       | 0.033           | 0.155       | 0.193           |
| Synergistetes            | 0.417       | <0.01           | 0.130       | 0.277           |
| Firmicutes/Bacteroidetes | -0.698      | <0.01           | -0.003      | 0.983           |

DF, total dietary fiber, sum of soluble and insoluble fiber.

**Supplemental Table 2.** Bacterial genera correlated by Pearson's correlation to gestation stage and DF level.

| Phyla                | Genera                                       | Stage       |         | DF          |         |
|----------------------|----------------------------------------------|-------------|---------|-------------|---------|
|                      |                                              | Coefficient | P-value | Coefficient | P-value |
| Firmicutes           | <i>Clostridium_sensu_stricto_1</i>           | -0.536      | <0.01   | 0.208       | 0.080   |
|                      | <i>Streptococcus</i>                         | 0.078       | 0.516   | -0.263      | 0.026   |
|                      | <i>Ruminococcaceae_NK4A214_group</i>         | -0.493      | <0.01   | 0.010       | 0.935   |
|                      | <i>Ruminococcaceae_UCG-002</i>               | -0.394      | <0.01   | -0.017      | 0.885   |
|                      | <i>Ruminococcaceae_UCG-005</i>               | -0.269      | 0.023   | -0.073      | 0.542   |
|                      | <i>Ruminococcaceae_UCG-010</i>               | -0.531      | <0.01   | 0.050       | 0.678   |
|                      | <i>Ruminococcaceae_UCG-014</i>               | -0.484      | <0.01   | -0.080      | 0.506   |
|                      | <i>Turicibacter</i>                          | -0.559      | <0.01   | 0.063       | 0.601   |
|                      | <i>Terrisporobacter</i>                      | -0.494      | <0.01   | 0.003       | 0.980   |
|                      | <i>[Eubacterium]_coprostanoligenes_group</i> | -0.416      | <0.01   | -0.158      | 0.184   |
|                      | <i>Romboutsia</i>                            | -0.531      | <0.01   | -0.036      | 0.763   |
|                      | <i>Oscillospira</i>                          | 0.346       | <0.01   | 0.228       | 0.055   |
|                      | <i>Ruminococcus_1</i>                        | 0.326       | <0.01   | 0.025       | 0.835   |
|                      | <i>Sarcina</i>                               | 0.322       | <0.01   | 0.025       | 0.835   |
|                      | <i>Anaerotruncus</i>                         | -0.242      | 0.041   | -0.059      | 0.625   |
|                      | <i>Blautia</i>                               | 0.281       | 0.017   | -0.096      | 0.425   |
|                      | <i>Ruminiclostridium_6</i>                   | 0.428       | <0.01   | 0.214       | 0.071   |
|                      | <i>[Anaerorhabdus]_furcosa_group</i>         | -0.574      | <0.01   | 0.039       | 0.745   |
|                      | <i>Subdoligranulum</i>                       | 0.395       | <0.01   | -0.177      | 0.136   |
|                      | <i>Quinella</i>                              | 0.412       | <0.01   | 0.182       | 0.126   |
| <i>Oscillibacter</i> | -0.429                                       | <0.01       | -0.034  | 0.778       |         |
| Bacteroidetes        | <i>Prevotellaceae_NK3B31_group</i>           | 0.584       | <0.01   | -0.250      | 0.034   |
|                      | <i>Prevotellaceae_UCG-001</i>                | 0.08        | 0.502   | 0.252       | 0.033   |
|                      | <i>Prevotella_1</i>                          | 0.488       | <0.01   | -0.303      | 0.010   |
|                      | <i>Prevotella_9</i>                          | 0.508       | <0.01   | -0.293      | 0.013   |
|                      | <i>Prevotellaceae_UCG-003</i>                | 0.546       | <0.01   | -0.123      | 0.303   |
|                      | <i>Parabacteroides</i>                       | 0.489       | <0.01   | 0.008       | 0.949   |
|                      | <i>Alloprevotella</i>                        | 0.654       | <0.01   | -0.012      | 0.919   |
| Proteobacteria       | <i>Desulfovibrio</i>                         | 0.441       | <0.01   | 0.097       | 0.417   |
|                      | <i>Succinivibrio</i>                         | 0.408       | <0.01   | -0.307      | <0.01   |
|                      | <i>Escherichia-Shigella</i>                  | 0.411       | <0.01   | -0.001      | 0.995   |
| Fibrobacteres        | <i>Fibrobacter</i>                           | 0.448       | <0.01   | 0.066       | 0.584   |
| Actinobacteria       | <i>Bifidobacterium</i>                       | 0.344       | <0.01   | -0.011      | 0.926   |

DF, total dietary fiber, sum of soluble and insoluble fiber.
